# Supplementary material for: Synthesis and characterisation of new coordination polymers by combining 2-pyridyl oximes or alcohols with functionalised terephthalic acid analogues
Source: Royal Society of Chemistry journal article supplement (doi:10.1039/d3ce00727h), 2023-01-01
Supplement: d3ce00727h1.pdf [file d3ce00727h1.pdf]

## **SUPPORTING MATERIAL**

### **Synthesis and Characterisation of New Coordination Polymers by Combining 2-Pyridyl Oximes or Alcohols with Functionalised Terephthalic Acid Analogues**

**Foteini Dimakopoulou,<sup>a</sup> Constantinos G. Efthymiou,<sup>a</sup> Andreas Kourtellaris,<sup>b</sup>  
Ciaran O'Malley,<sup>a,‡</sup> Lamis Alaa Eldin Refat,<sup>a</sup> Anastasios Tasiopoulos,<sup>b</sup> Patrick  
McArdle,<sup>a</sup> and Constantina Papatriantafyllopoulou\*<sup>a</sup>**

---

<sup>a.</sup> *School of Biological and Chemical Sciences, College of Science and Engineering,  
University of Galway, H91 TK33 Galway, Ireland. E-mail address:*

*[constantina.papatriantafyllopo@universityofgalway.ie](mailto:constantina.papatriantafyllopo@universityofgalway.ie) Tel: +353 91 493462*

<sup>b.</sup> *Department of Chemistry, University of Cyprus, 1678 Nicosia, Cyprus.*

<sup>‡</sup> *Current address: Department of Physics, Bernal Institute, University of Limerick, Limerick,  
Republic of Ireland.*

Table S1: Crystallographic data for **1-7**

| Complex                                                                               | <b>1</b> ·3DMF                                                    | <b>2</b> ·2DMF                                                   | <b>3</b>                                                                        |
|---------------------------------------------------------------------------------------|-------------------------------------------------------------------|------------------------------------------------------------------|---------------------------------------------------------------------------------|
| Empirical formula                                                                     | C <sub>29</sub> H <sub>37</sub> N <sub>9</sub> O <sub>11</sub> Zn | C <sub>23</sub> H <sub>25</sub> N <sub>7</sub> O <sub>9</sub> Mn | C <sub>50</sub> H <sub>42</sub> N <sub>12</sub> O <sub>12</sub> Co <sub>3</sub> |
| Formula weight                                                                        | 753.04                                                            | 598.44                                                           | 1179.74                                                                         |
| Crystal system                                                                        | Triclinic                                                         | Triclinic                                                        | Triclinic                                                                       |
| Space group                                                                           | <i>P</i> $\bar{1}$                                                | <i>P</i> $\bar{1}$                                               | <i>P</i> $\bar{1}$                                                              |
| <i>a</i> (Å)                                                                          | 9.3796 (7)                                                        | 9.5541(6)                                                        | 11.1458(8)                                                                      |
| <i>b</i> (Å)                                                                          | 12.5378 (8)                                                       | 10.0432(6)                                                       | 14.7658(8)                                                                      |
| <i>c</i> (Å)                                                                          | 15.3451 (10)                                                      | 15.8933(8)                                                       | 18.7690(9)                                                                      |
| $\alpha$ (°)                                                                          | 87.967 (5)                                                        | 76.089(5)                                                        | 81.504(4)                                                                       |
| $\beta$ (°)                                                                           | 73.076 (6)                                                        | 72.979(5)                                                        | 89.225(5)                                                                       |
| $\gamma$ (°)                                                                          | 84.839 (6)                                                        | 76.732(5)                                                        | 86.463(5)                                                                       |
| <i>V</i> (Å <sup>3</sup> )                                                            | 1719.3 (2)                                                        | 1394.49(15)                                                      | 3049.2(3)                                                                       |
| <i>Z</i>                                                                              | 2                                                                 | 2                                                                | 2                                                                               |
| $\rho_{\text{calc}}$ (g cm <sup>-3</sup> )                                            | 1.455                                                             | 1.406                                                            | 1.285                                                                           |
| Radiation, $\lambda$ (Å)                                                              | 1.54184                                                           | 1.54184                                                          | 1.54184                                                                         |
| $\mu$ (mm <sup>-1</sup> )                                                             | 1.608                                                             | 4.392                                                            | 6.851                                                                           |
| Measd/independent reflns ( <i>R</i> <sub>int</sub> )                                  | 11682 /6767 (0.060)                                               | 9478/ 6313 (0.0588)                                              | 21718/11529 (0.0992)                                                            |
| Parameters refined                                                                    | 483                                                               | 722                                                              | 694                                                                             |
| GoF (on <i>F</i> <sup>2</sup> )                                                       | 1.130                                                             | 1.135                                                            | 1.020                                                                           |
| <i>R</i> <sub>1</sub> <sup>a</sup> ( <i>I</i> > 2 $\sigma$ ( <i>I</i> ))              | 0.0656                                                            | 0.0778                                                           | 0.0764                                                                          |
| <i>wR</i> <sub>2</sub> <sup>b</sup> ( <i>I</i> > 2 $\sigma$ ( <i>I</i> ))             | 0.1816                                                            | 0.2130                                                           | 0.2121                                                                          |
| ( $\Delta\rho$ ) <sub>max</sub> /( $\Delta\rho$ ) <sub>min</sub> (e Å <sup>-3</sup> ) | 0.919/-0.772                                                      | 0.895 / -0.929                                                   | 0.913 /-1.047                                                                   |
| Complex                                                                               | <b>4</b> ·DMF                                                     | <b>5</b>                                                         | <b>6</b> ·2DMF                                                                  |
| Empirical formula                                                                     | C <sub>23</sub> H <sub>25</sub> N <sub>3</sub> O <sub>9</sub> Ni  | C <sub>20</sub> H <sub>16</sub> N <sub>2</sub> O <sub>8</sub> Zn | C <sub>26</sub> H <sub>30</sub> N <sub>8</sub> O <sub>9</sub> Ni                |
| Formula weight                                                                        | 546.17                                                            | 461.74                                                           | 657.29                                                                          |
| Crystal system                                                                        | Triclinic                                                         | Monoclinic                                                       | Monoclinic                                                                      |
| Space group                                                                           | <i>P</i> $\bar{1}$                                                | <i>P</i> 2/ <i>n</i>                                             | <i>P</i> 2 1/ <i>c</i>                                                          |

|                                                                            |                     |                    |                       |
|----------------------------------------------------------------------------|---------------------|--------------------|-----------------------|
| $a$ (Å)                                                                    | 9.6616(13)          | 9.49420(2)         | 17.2182(10)           |
| $b$ (Å)                                                                    | 10.644(2)           | 10.0245(3)         | 10.0832(6)            |
| $c$ (Å)                                                                    | 12.4656(15)         | 13.4633(4)         | 18.2479(9)            |
| $\alpha$ (°)                                                               | 95.832(14)          | 90                 | 90                    |
| $\beta$ (°)                                                                | 90.191(11)          | 93.449(2)°         | 105.108(5)            |
| $\gamma$ (°)                                                               | 97.496(15)          | 90                 | 90                    |
| $V$ (Å <sup>3</sup> )                                                      | 1264.2(4)           | 1278.75(7)         | 3058.6(3)             |
| $Z$                                                                        | 2                   | 2                  | 4                     |
| $\rho_{\text{calc}}$ (g cm <sup>-3</sup> )                                 | 1.435               | 1.199              | 1.427                 |
| Radiation, $\lambda$ (Å)                                                   | 0.71073             | 1.54184            | 0.71073               |
| $\mu$ (mm <sup>-1</sup> )                                                  | 0.823               | 1.654              | 0.698                 |
| Measd/independent reflns ( $R_{\text{int}}$ )                              | 8537 /2970 (0.0963) | 8508/4741 (0.0332) | 21202 / 5571 (0.0911) |
| Parameters refined                                                         | 332                 | 145                | 419                   |
| GoF (on $F^2$ )                                                            | 0.707               | 1.043              | 0.901                 |
| $R_1^a$ ( $I > 2\sigma(I)$ )                                               | 0.0815              | 0.0419             | 0.0812                |
| $wR_2^b$ ( $I > 2\sigma(I)$ )                                              | 0.1818              | 0.1199             | 0.2268                |
| $(\Delta\rho)_{\text{max}}/(\Delta\rho)_{\text{min}}$ (e Å <sup>-3</sup> ) | 1.078/ -0.429       | 0.361/-0.289       | 1.147/- 1.242         |

---

|                   |                                                                                 |
|-------------------|---------------------------------------------------------------------------------|
| Complex           | <b>7·DMF</b>                                                                    |
| Empirical formula | C <sub>72</sub> H <sub>74</sub> N <sub>14</sub> O <sub>24</sub> Zn <sub>3</sub> |
| Formula weight    | 1715.56                                                                         |
| Crystal system    | Monoclinic                                                                      |
| Space group       | <i>Ia</i>                                                                       |
| $a$ (Å)           | 18.3768(9)                                                                      |
| $b$ (Å)           | 10.3212(6)                                                                      |
| $c$ (Å)           | 45.523(2)                                                                       |
| $\alpha$ (°)      | 90                                                                              |
| $\beta$ (°)       | 92.253(4)                                                                       |
| $\gamma$ (°)      | 90                                                                              |

|                                                                               |                           |
|-------------------------------------------------------------------------------|---------------------------|
| $V$ (Å <sup>3</sup> )                                                         | 8627.6(8)                 |
| $Z$                                                                           | 4                         |
| $\rho_{\text{calc}}$ (g cm <sup>-3</sup> )                                    | 1.321                     |
| Radiation, $\lambda$ (Å)                                                      | 0.71073                   |
| $\mu$ (mm <sup>-1</sup> )                                                     | 0.904                     |
| Measd/independent<br>reflns ( $R_{\text{int}}$ )                              | 36376 / 18203<br>(0.1108) |
| Parameters refined                                                            | 985                       |
| GoF (on $F^2$ )                                                               | 0.982                     |
| $R_1^a$ ( $I > 2\sigma(I)$ )                                                  | 0.1022                    |
| $wR_2^b$ ( $I > 2\sigma(I)$ )                                                 | 0.2450                    |
| $(\Delta\rho)_{\text{max}}/(\Delta\rho)_{\text{min}}$<br>(e Å <sup>-3</sup> ) | 1.437 / -0.453            |

Table S2: Hydrogen bonding details for 1-3DMF.

| D – H ... A             | D ... A | H ... A | DHA   | Symmetry operator |
|-------------------------|---------|---------|-------|-------------------|
|                         | (Å)     | (Å)     | (°)   | of A              |
| O(8) – H(8) ... O(5)    | 2.570   | 1.787   | 140.0 | x, y, z           |
| O(2) – H(2) ... O(4)    | 2.550   | 1.603   | 165.5 | x, y, z           |
| O(7) – H(7) ... O(3)    | 2.520   | 1.566   | 147.6 | x, y, z           |
| O(1) – H(1) ... O(6)    | 2.549   | 1.584   | 175.8 | x, y, z           |
| N(3) – H(1N3) ... O(11) | 2.869   | 2.037   | 158.1 | x, y, z           |
| N(3) -H(2N3)...O(10)    | 2.890   | 2.160   | 148.5 | x, y, z           |
| N(6)-H(2N6)...O(7)      | 2.957   | 2.171   | 150.2 | -1+x, y, z        |
| N(6)-H(1N6)...O(1)      | 3.028   | 2.254   | 166.2 | -1+x, y, z        |

A=acceptor, D=donor

Table S3: Hydrogen bonding details for **4**-DMF.

| D – H ... A           | D ... A | H ... A | DHA   | Symmetry operator |
|-----------------------|---------|---------|-------|-------------------|
|                       | (Å)     | (Å)     | (°)   | of A              |
| O(3) – H(3A) ... O(2) | 2.516   | 1.809   | 143.7 | 1-x, 2-y, 1-z     |
| O(8) – H(8) ... O(1)  | 2.609   | 1.789   | 177.6 | x, y, z           |
| O(7) – H(7A) ... O(5) | 2.605   | 1.849   | 152.5 | x, y, z           |
| O(6) – H(6) ... O(5)  | 2.583   | 1.867   | 145.2 | x, y, z           |

A=acceptor, D=donor

Table S4: Hydrogen bonding details for **6**-2DMF.

| D – H ... A            | D ... A | H ... A | DHA   | Symmetry operator |
|------------------------|---------|---------|-------|-------------------|
|                        | (Å)     | (Å)     | (°)   | of A              |
| O(3) – H(3A) ... O(4)  | 2.497   | 2.176   | 103.4 | x, y, z           |
| N(2) – H(2B) ... O(9A) | 2.843   | 2.033   | 156.5 | x, y, z           |
| O(6) – H(6) ... O(5)   | 2.583   | 1.867   | 145.2 | x, y, z           |
| N(2)-H(2A)...O(6)      | 2.576   | 2.276   | 100.6 | x, y, z           |
| N(6)-H(6A)...O(7)      | 2.576   | 2.280   | 100.6 | x, y, z           |

A=acceptor, D=donor

Table S5: Hydrogen bonding details for **7**·DMF.

| D – H ... A              | D ... A<br>(Å) | H ... A<br>(Å) | DHA<br>(°) | Symmetry operator<br>of A |
|--------------------------|----------------|----------------|------------|---------------------------|
| O(7) – H(7) ... O(2)     | 2.537          | 1.863          | 138.6      | x, y, z                   |
| O(5) –H(5B) ... O(3)     | 2.655          | 2.255          | 110.3      | x, y, z                   |
| O(10) – H(10B) ...O(11)  | 2.597          | 3.151          | 41.8       | x, y, z                   |
| O(15) – H(15A) ... O(18) | 2.512          | 1.751          | 153.4      | x, y, z                   |
| O(19) – H(19B) ... O(21) | 2.562          | 1.860          | 142.9      | x, y, z                   |
| O(14)-H(14A)...O(9)      | 2.519          | 1.778          | 149.3      | x, y, z                   |
| O(6)-H(6)...O(3)         | 2.634          | 1.890          | 150.1      | 0.5+x, 2-y, z             |
| O(13)-H(13A)...O(12)     | 2.556          | 1.755          | 164.3      | 0.5+x, 1-y, z             |
| O(16)-H(16)...O(20)      | 2.503          | 1.685          | 175.2      | -0.5+x, -y, z             |

A=acceptor, D=Donor

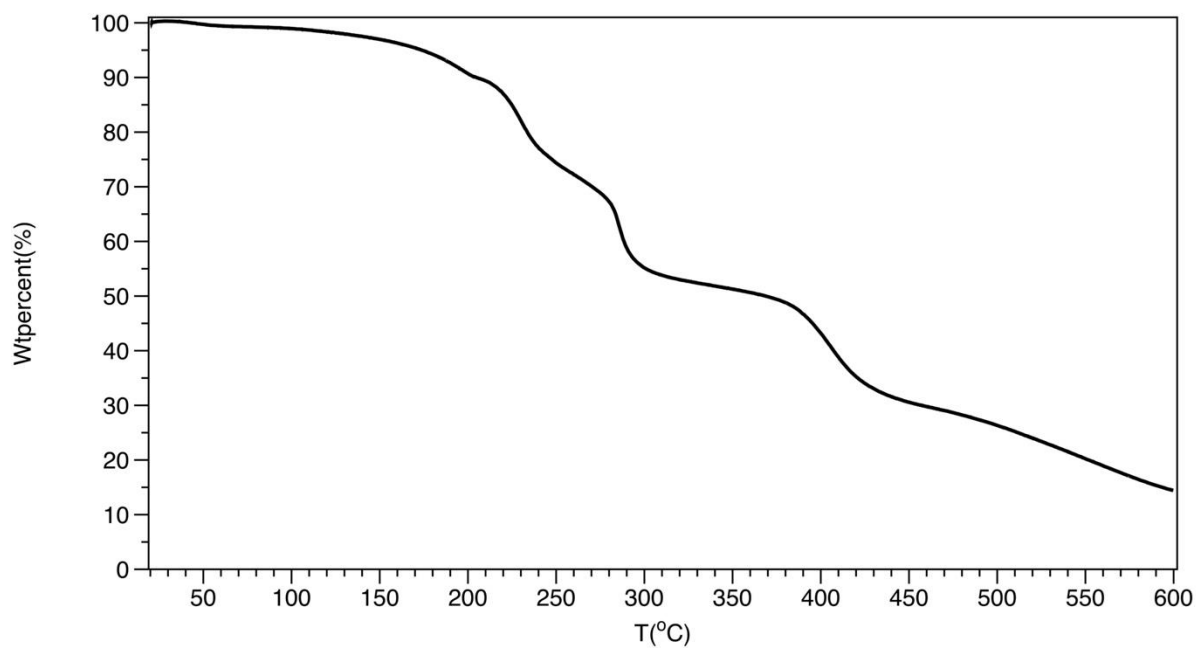

Fig. S1: TGA plot for **4**·DMF.

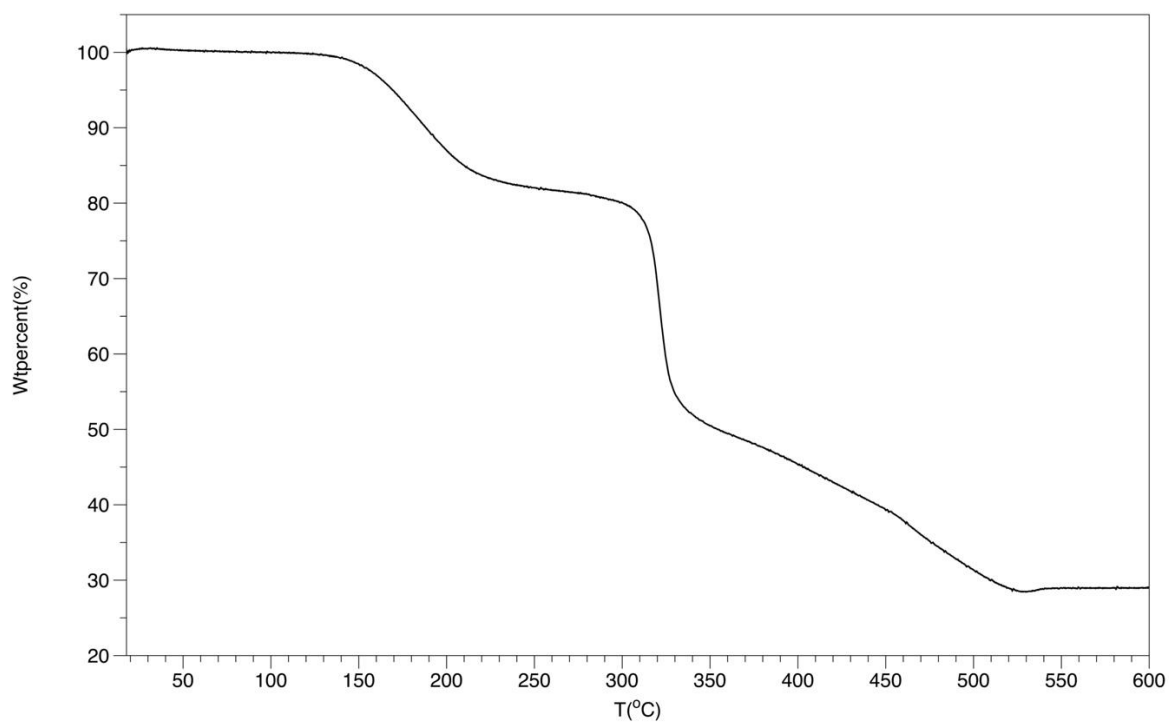

Fig. S2: TGA plot for **6**•2DMF.

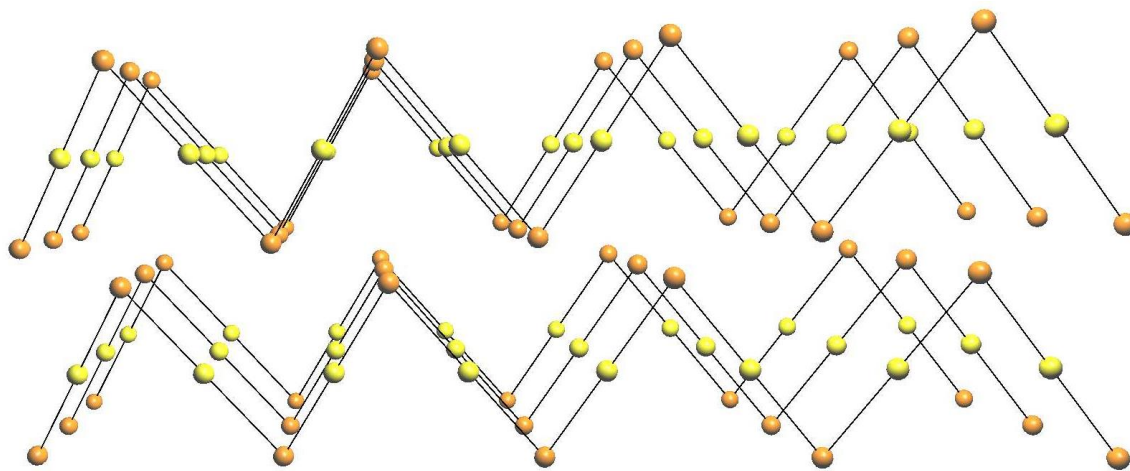

Fig. S3: The 2-c network of **1** along [100] plane ( $\{Zn(Hhmp)_2\}^{2+}$ :orange and  $H_2DHBDC$ :yellow node).

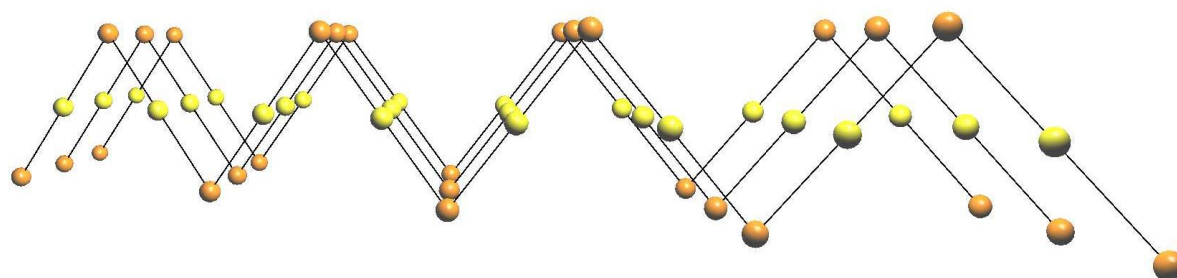

Fig. S4: The 2-c network of **5** along [100] plane ( $\{\text{Zn}(\text{H}_2\text{pyaox})_2\}^{2+}$ :orange and  $\text{H}_2\text{DHBDC}$ :yellow node).

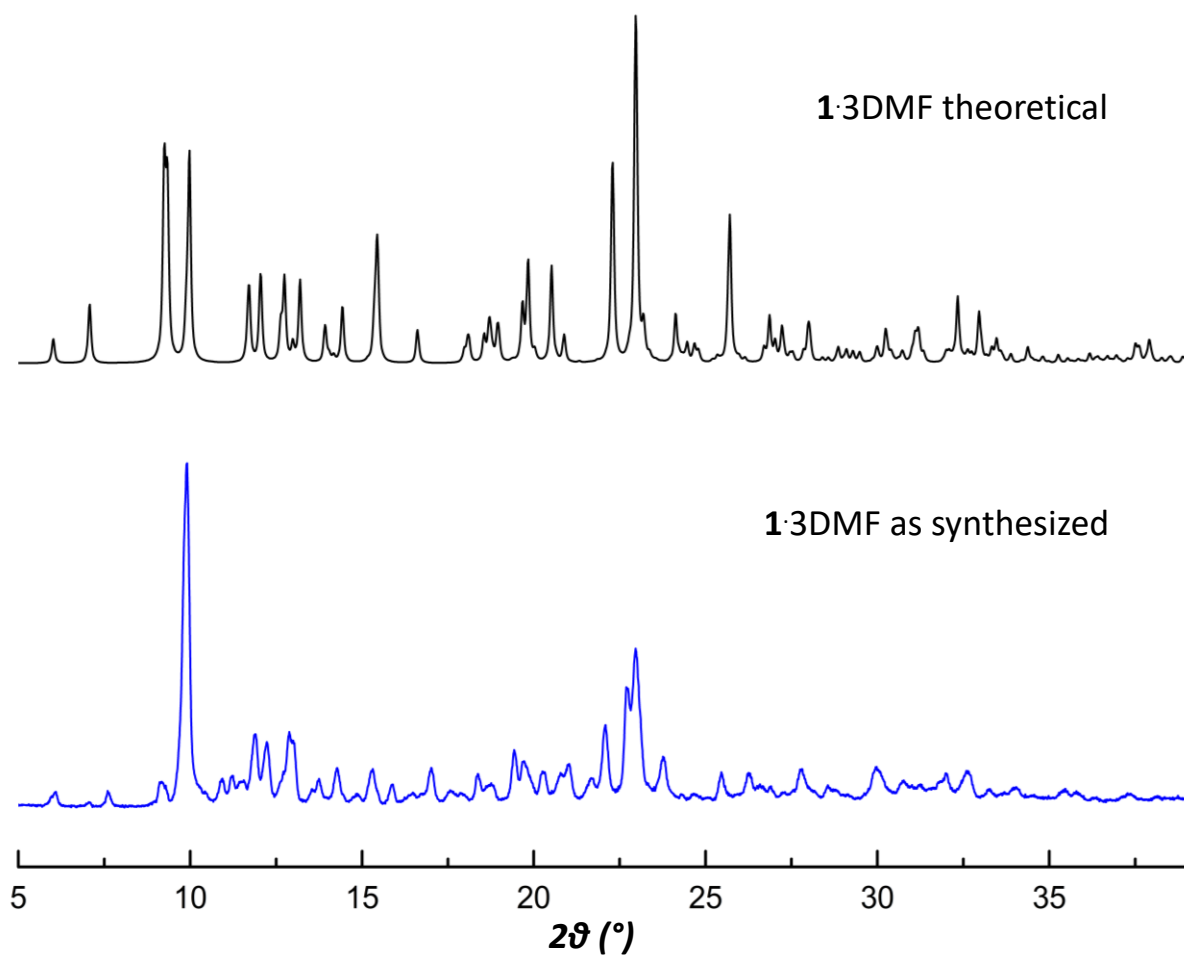

Fig. S5: The PXRD patterns of 1:3DMF as synthesized (below) and theoretical (above).



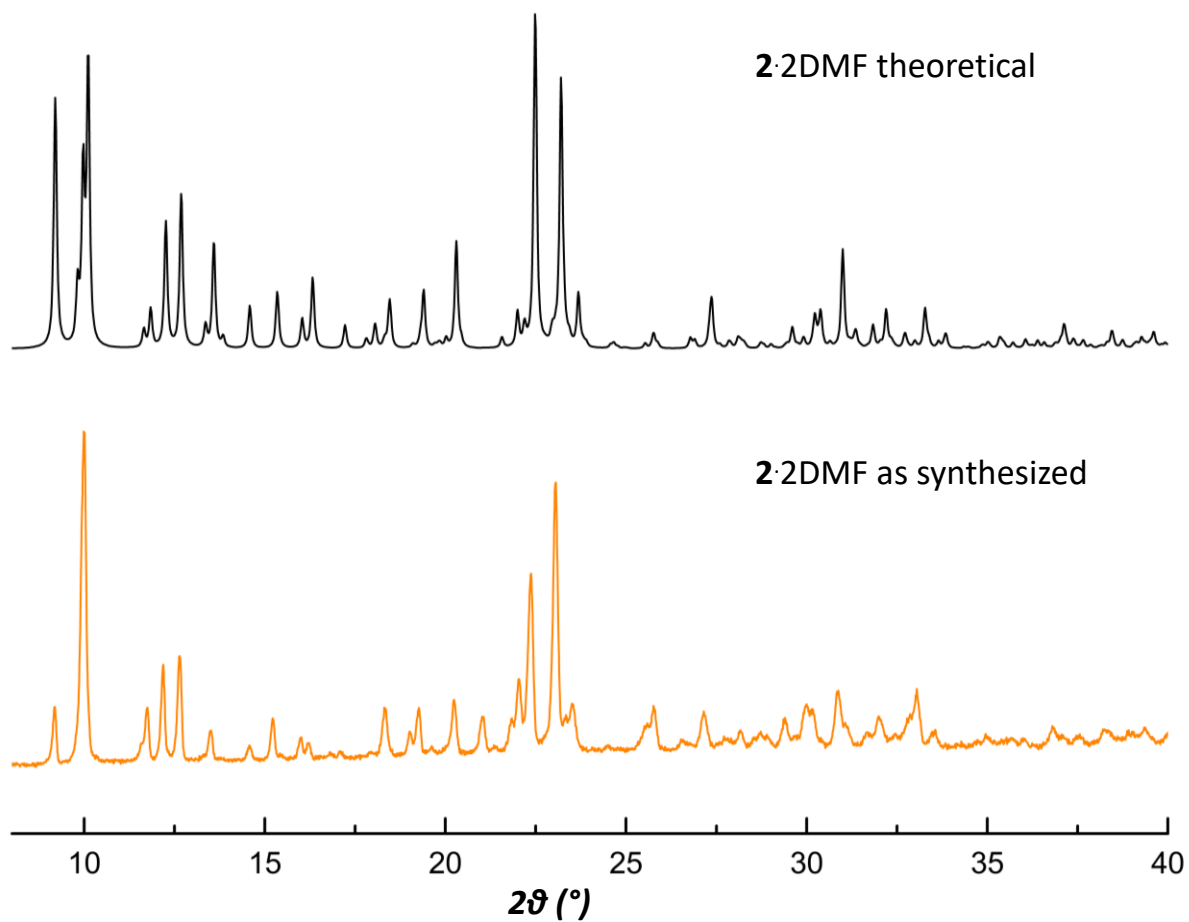

Fig. S6: The PXR D patterns of 2:2DMF as synthesized (below) and theoretical (above).

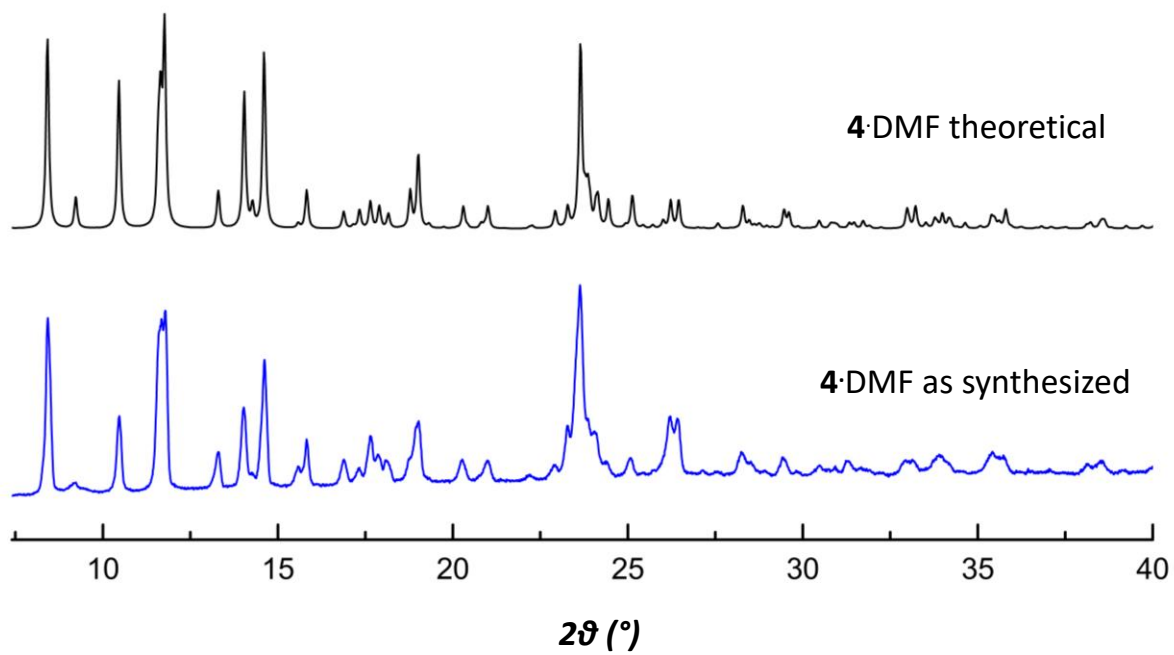

Fig. S7: The PXR D patterns of 4:DMF as synthesized (below) and theoretical (above).

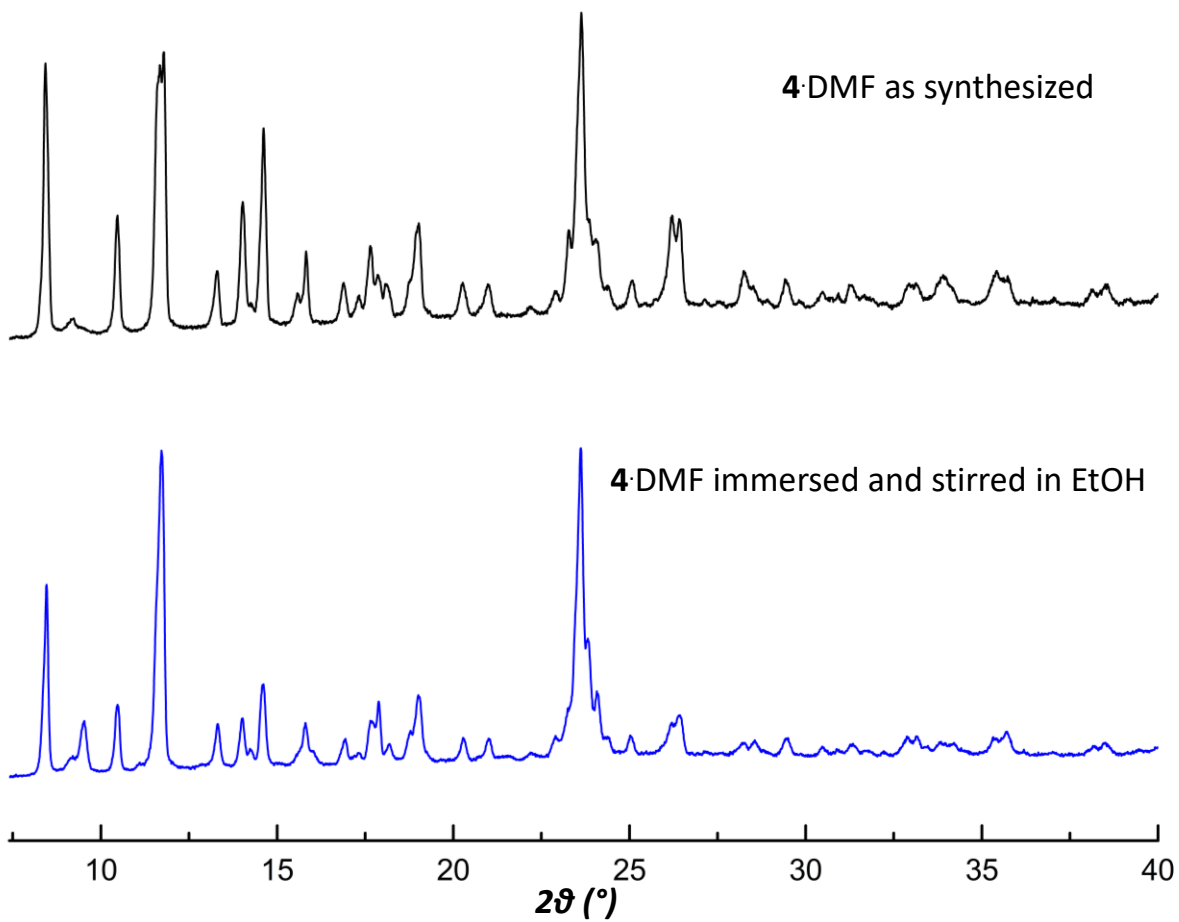

Fig. S8: The PXRD patterns of 4-DMF as synthesized (above) and after being immersed and stirred in EtOH for 100 h (below).

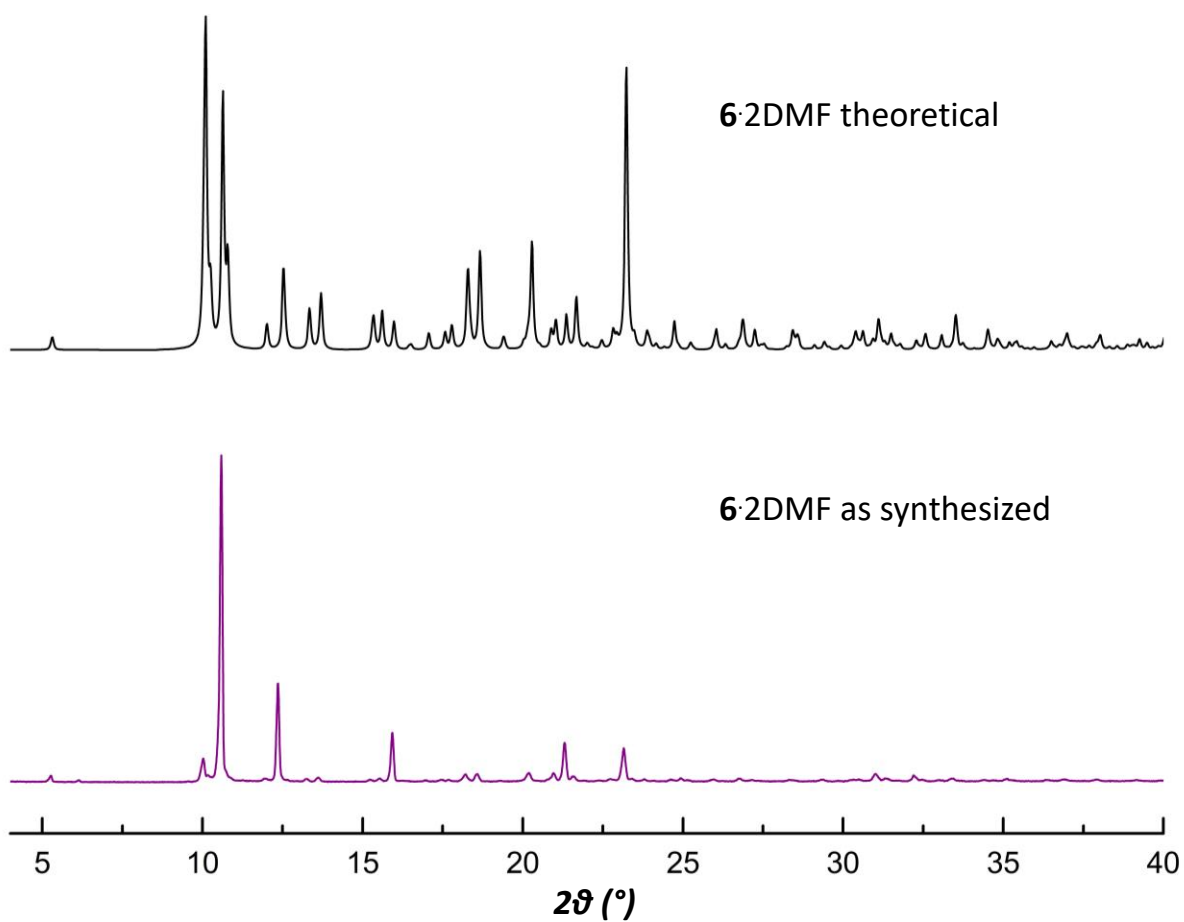

Fig. S9: The PXR patterns of 6-2DMF as synthesized (below) and theoretical (above).

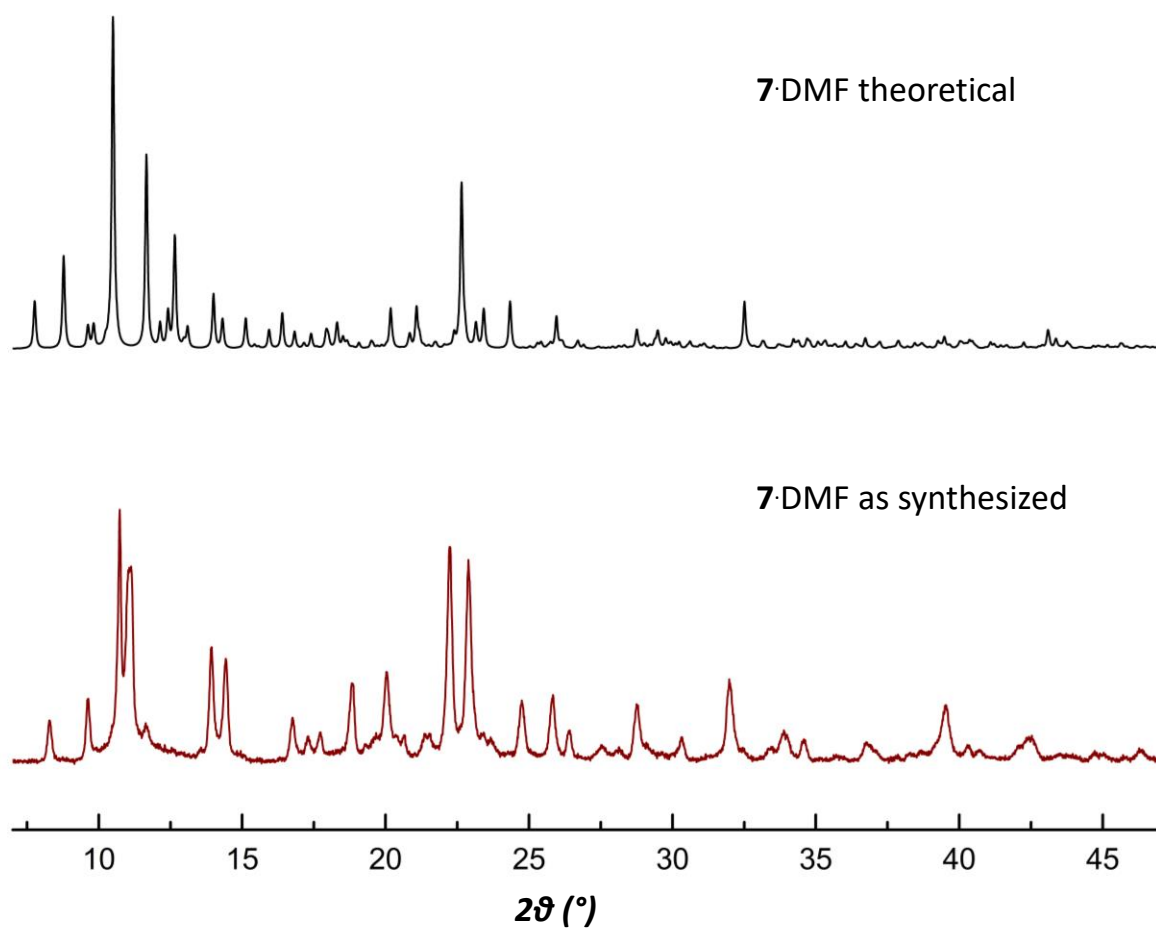

Fig. S10: The PXRD patterns of 7-DMF as synthesized (below) and theoretical (above).

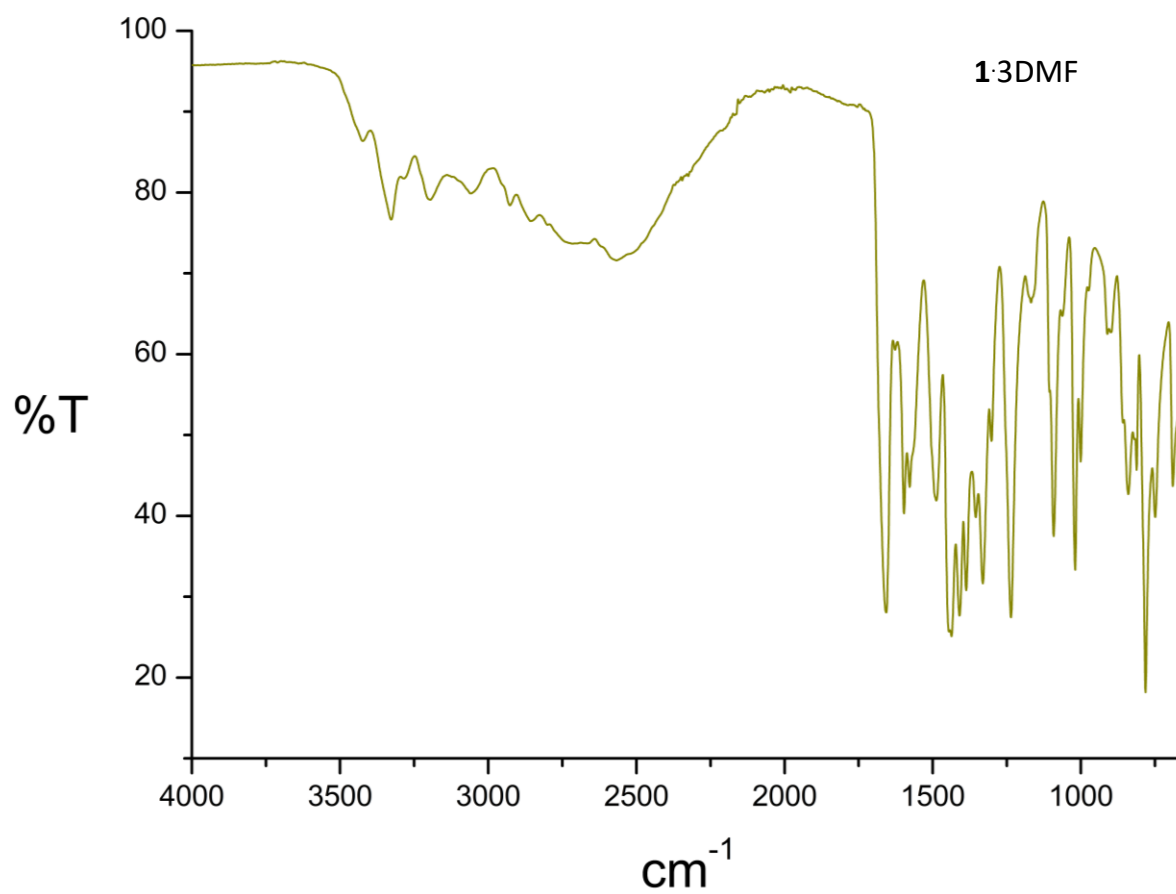

Fig. S11: IR spectrum of 1·3DMF

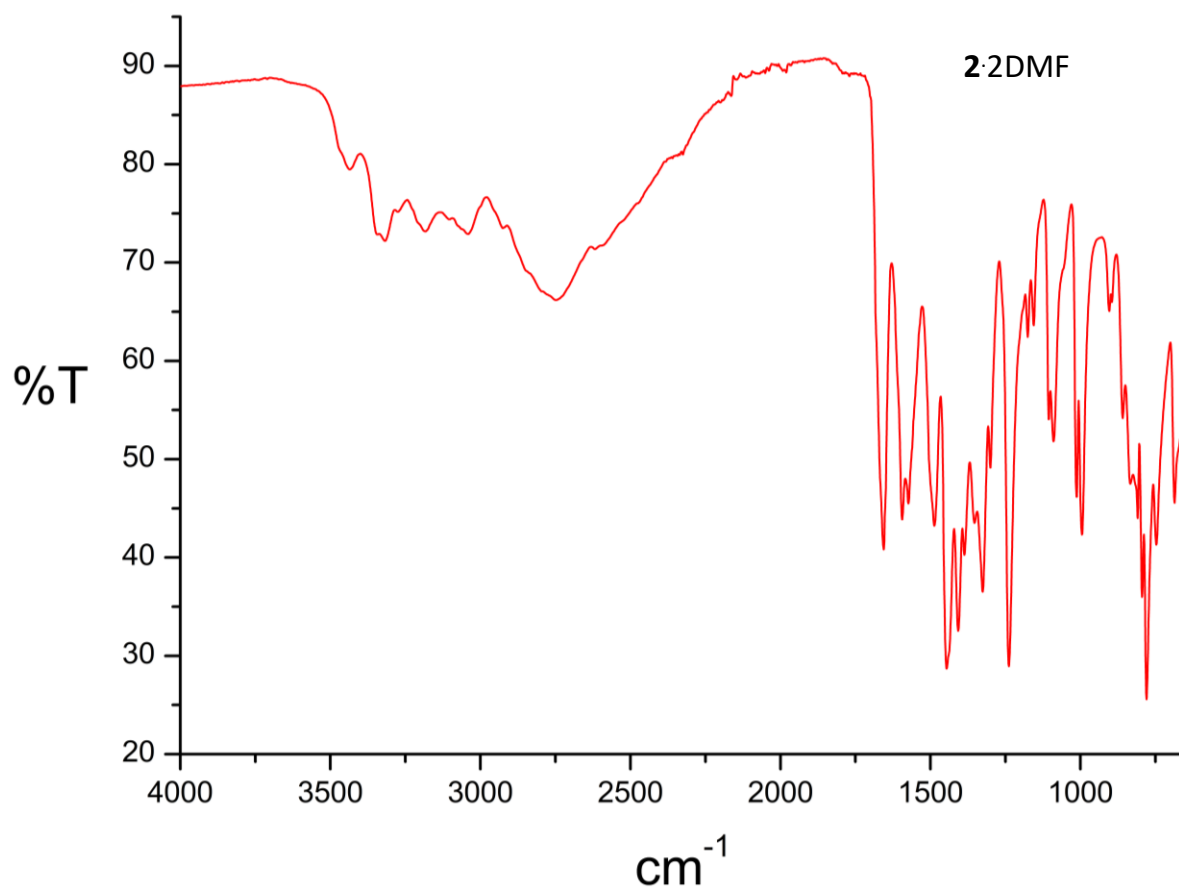

Fig. S12: IR spectrum of **2·2DMF**

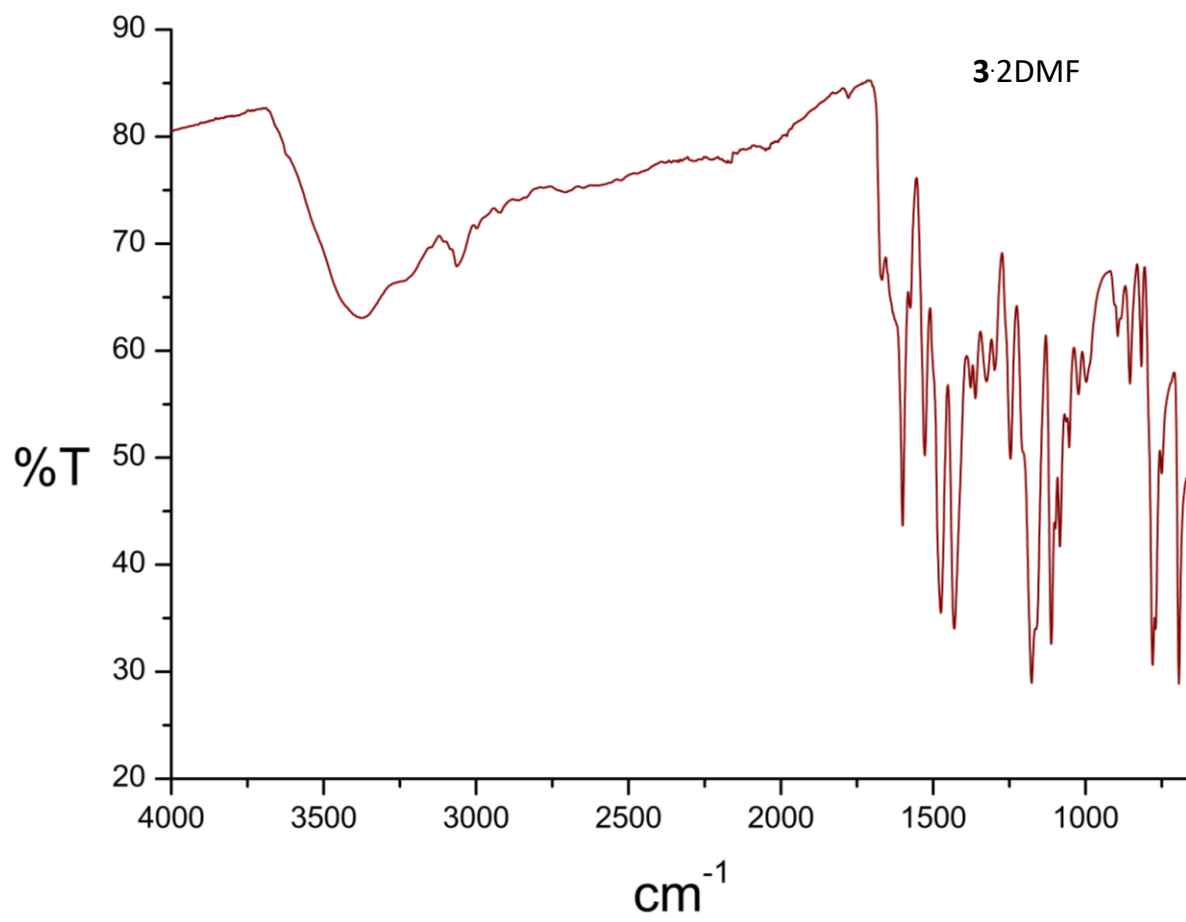

Fig. S13: IR spectrum of **3·2DMF**

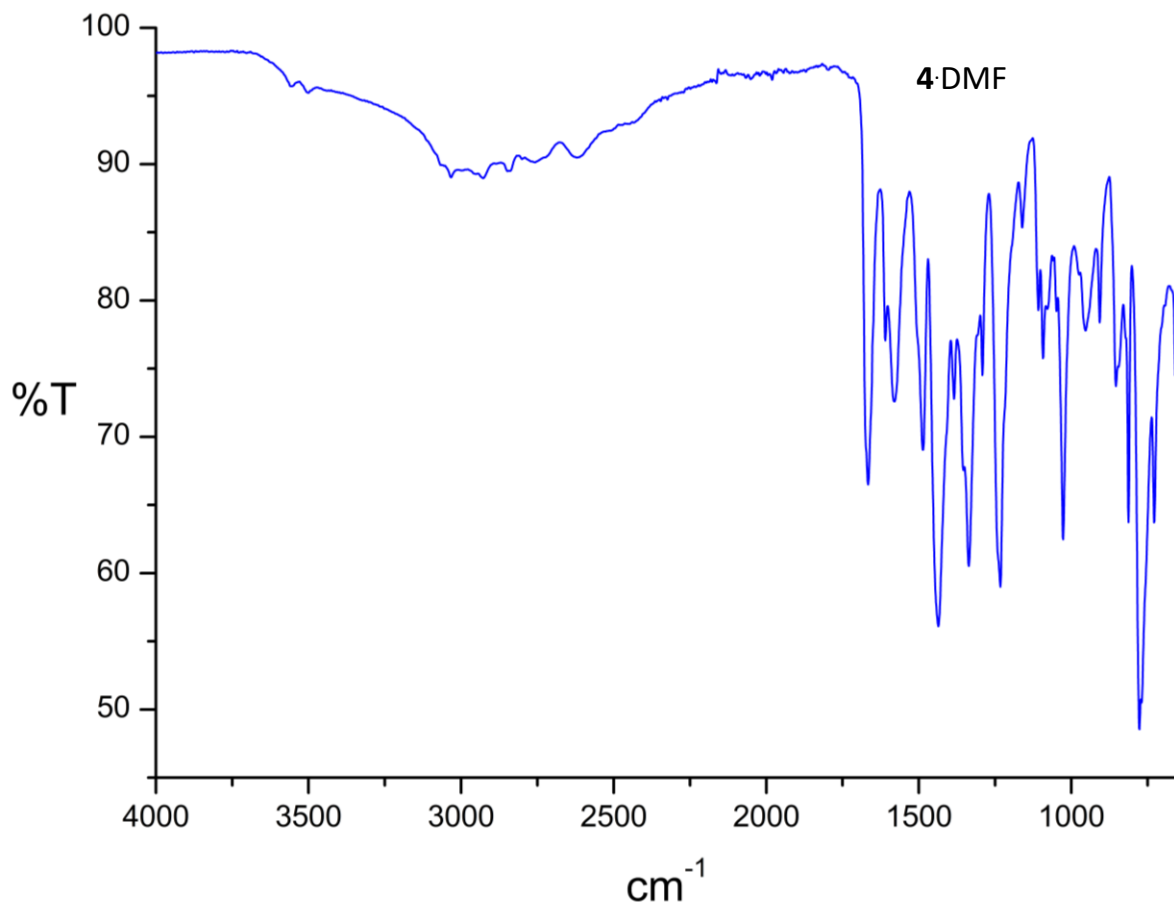

Fig. S14: IR spectrum of 4-DMF



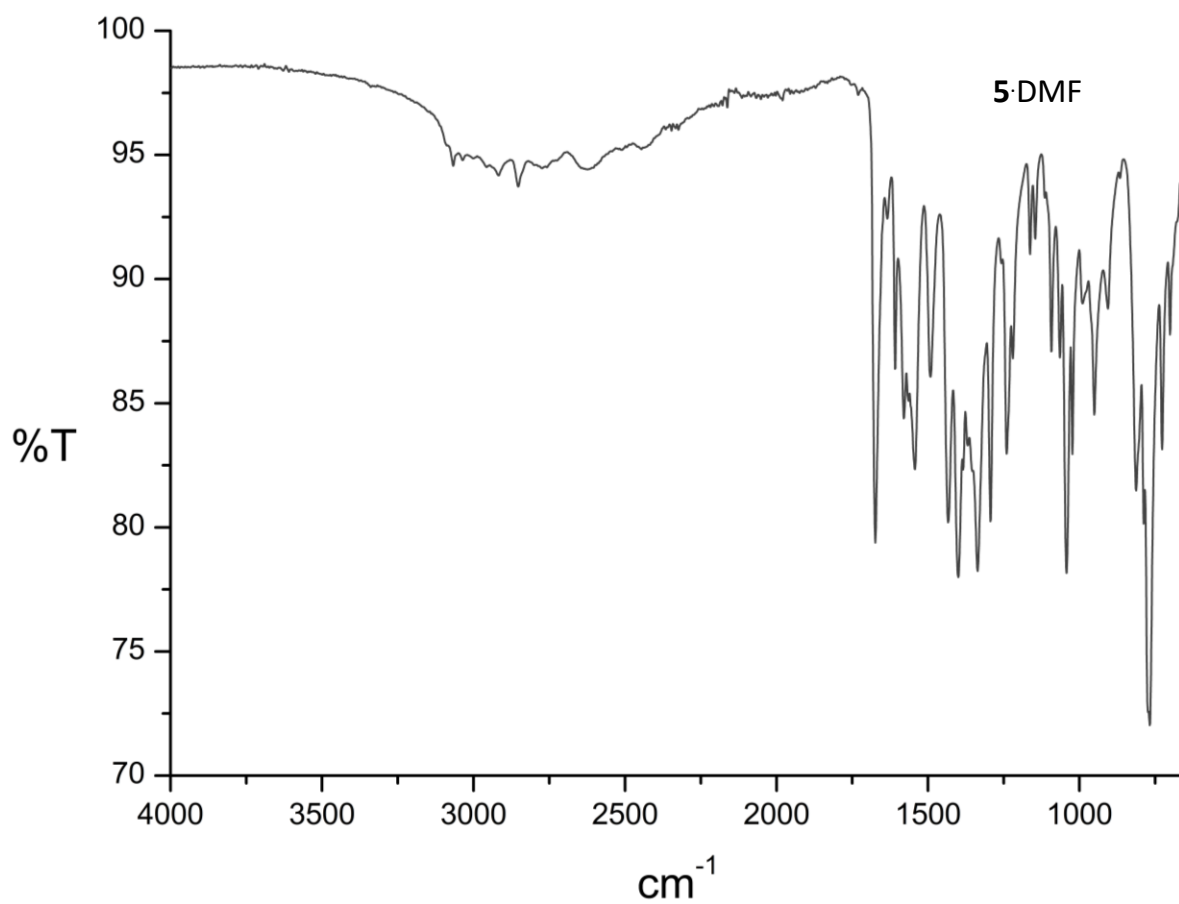

Fig. S15: IR spectrum of **5**·DMF

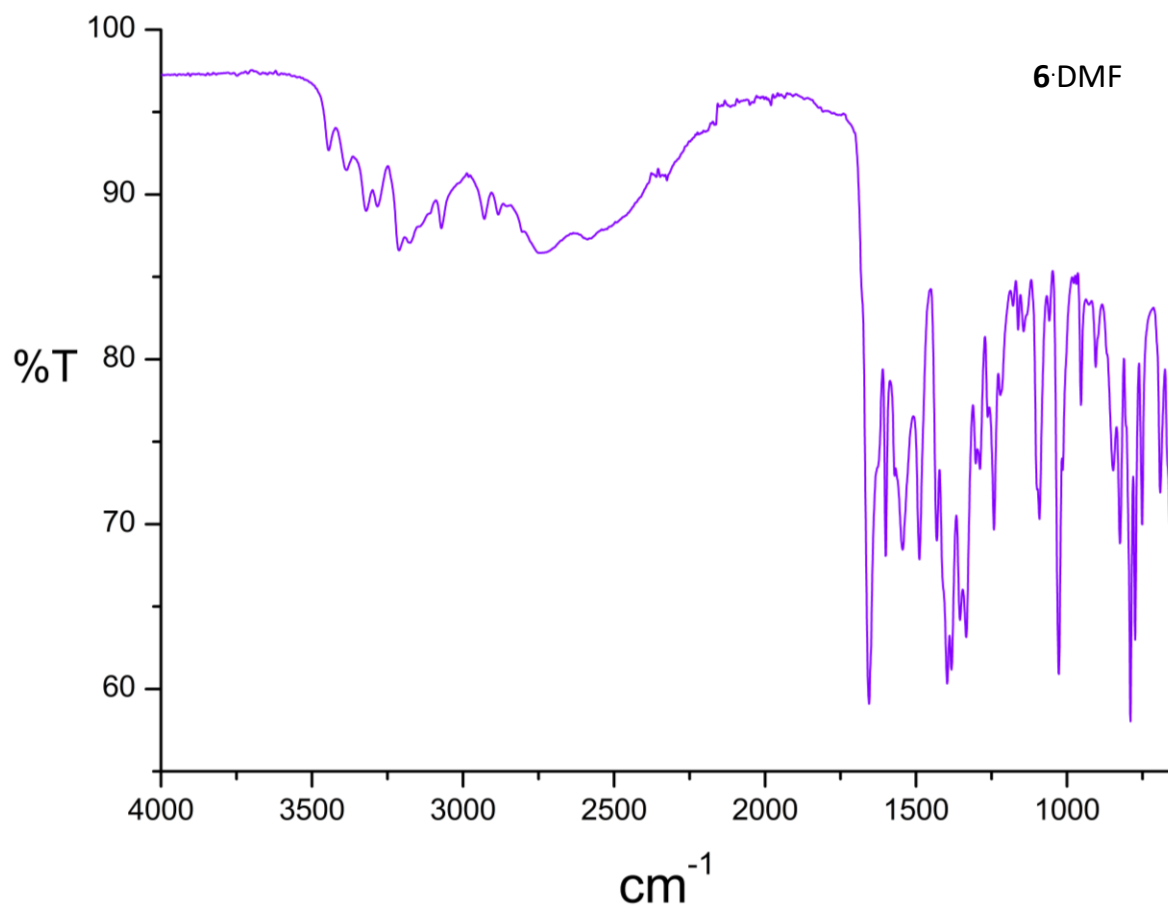

Fig. S16: IR spectrum of **6·DMF**

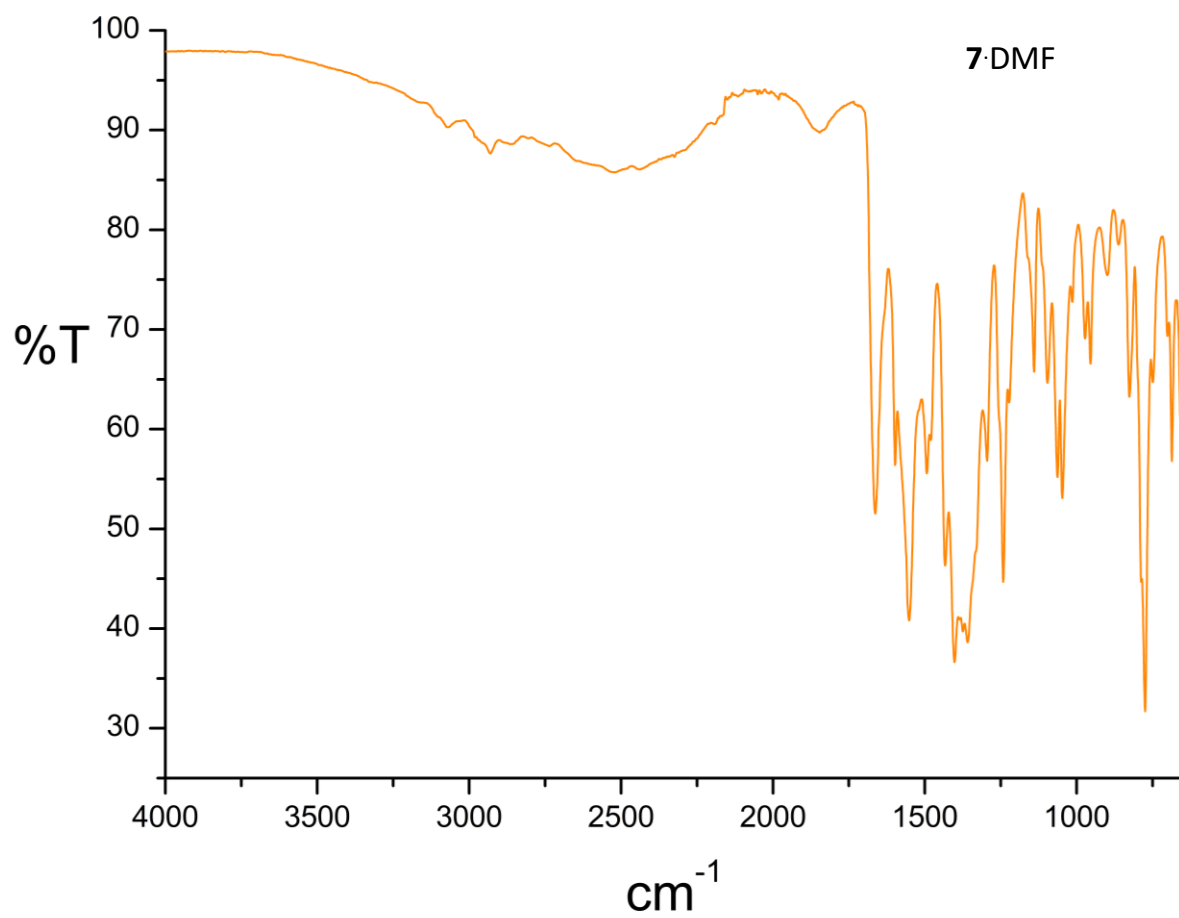

Fig. S17: IR spectrum of 7·DMF

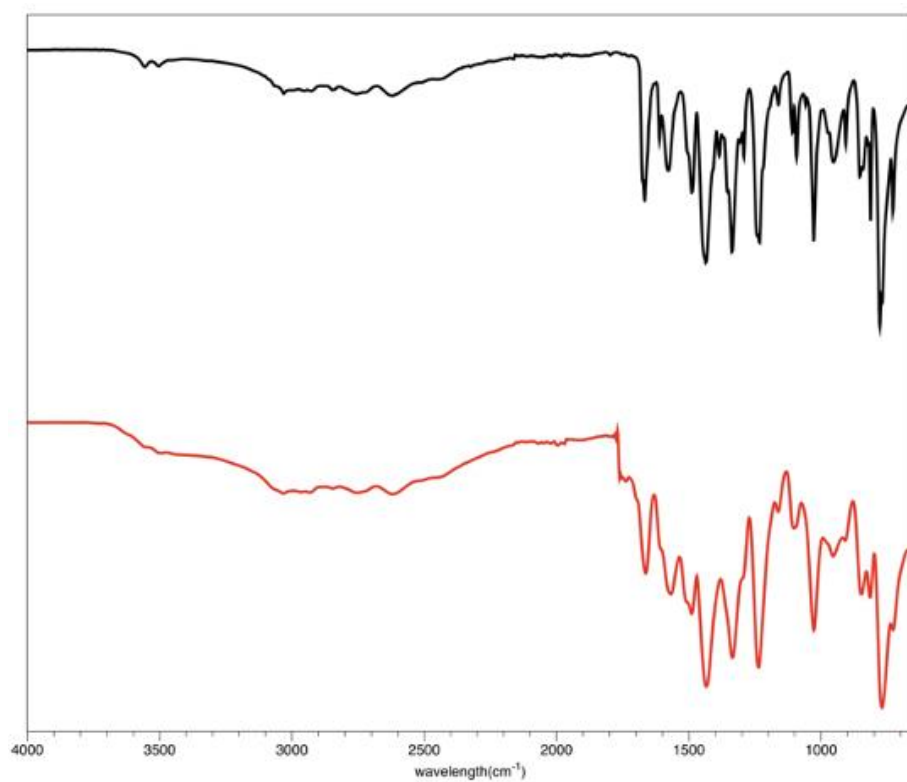

Fig. S18: IR spectrum of **4**•DMF before (top) and after (bottom) being stirred in EtOH for 100 h.

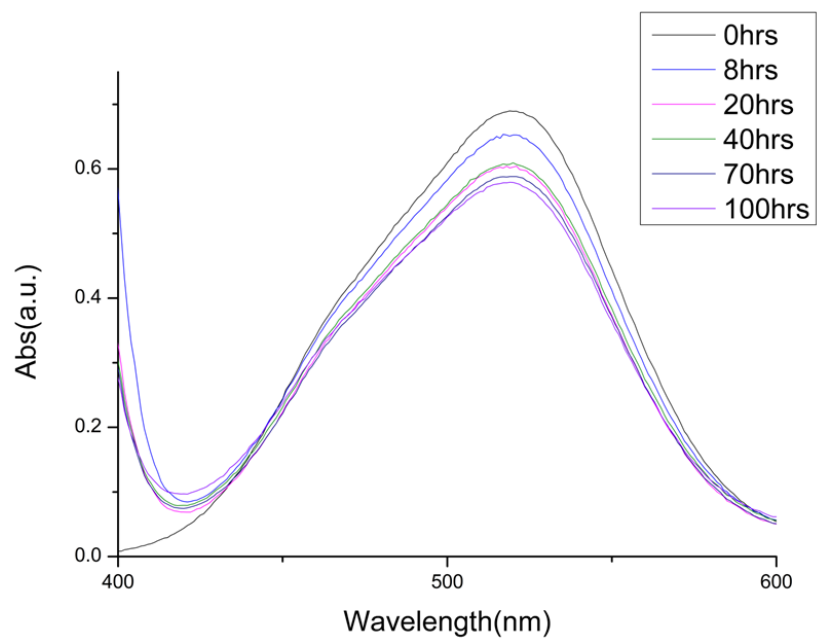

Fig. S19: UV-vis plots for Co@**4** encapsulation.

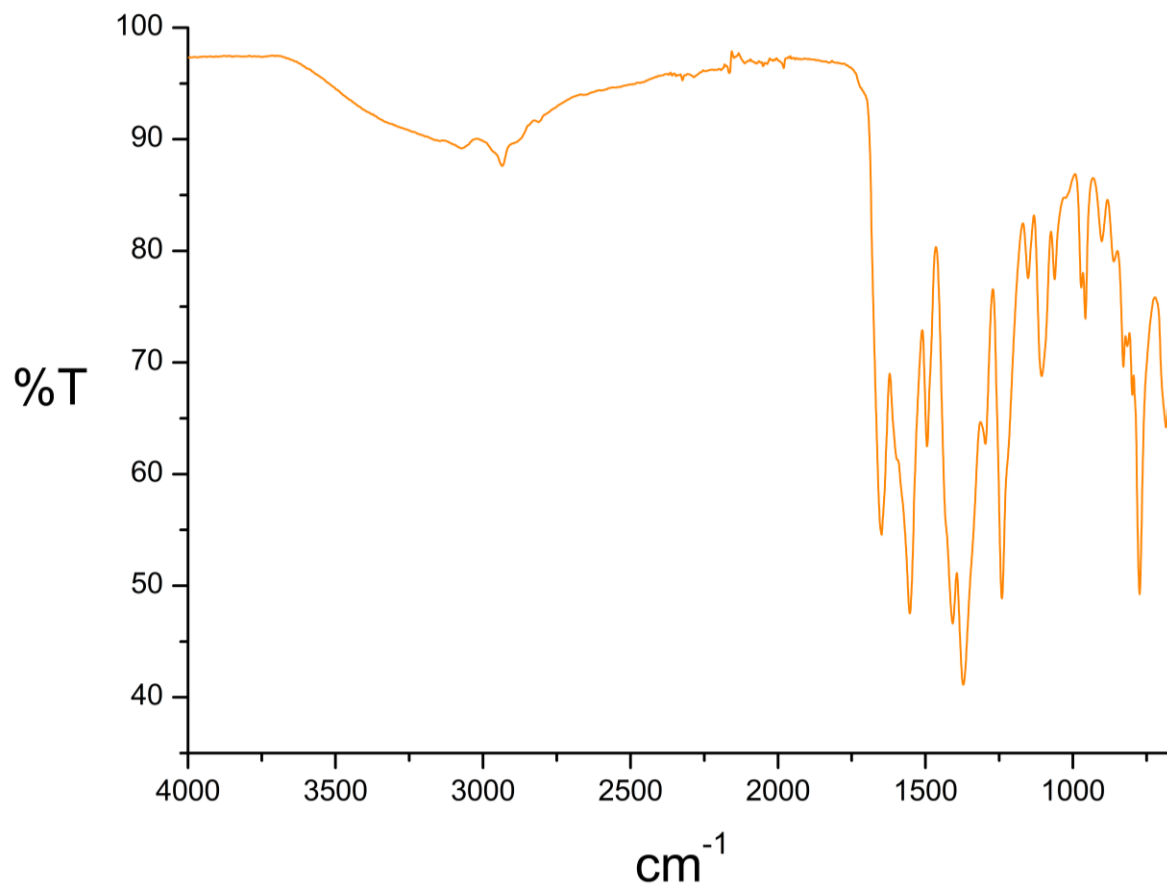

Fig. S20: IR spectrum of the product which has been derived by the reaction blend Hmpko:H<sub>3</sub>MHBDC: Zn(CH<sub>3</sub>CO<sub>2</sub>)<sub>2</sub>.2H<sub>2</sub>O in molar ratio 2:4:1. (excess of dicarboxylate). The product contains only the dicarboxylic linker.
